# Supplementary material
Source: HighWire-hosted journal article supplement (http://www.cmaj.ca/highwire/filestream/68011/field_highwire_adjunct_files/4/170088-res-5-at.pdf)
Supplement: 170088-res-5-at.pdf [file 170088-res-5-at.pdf]

**Appendix 5 (as supplied by the authors):** Population age-standardized suicide rates in perinatal and non-perinatal women by health region per 100, 000 person years\*

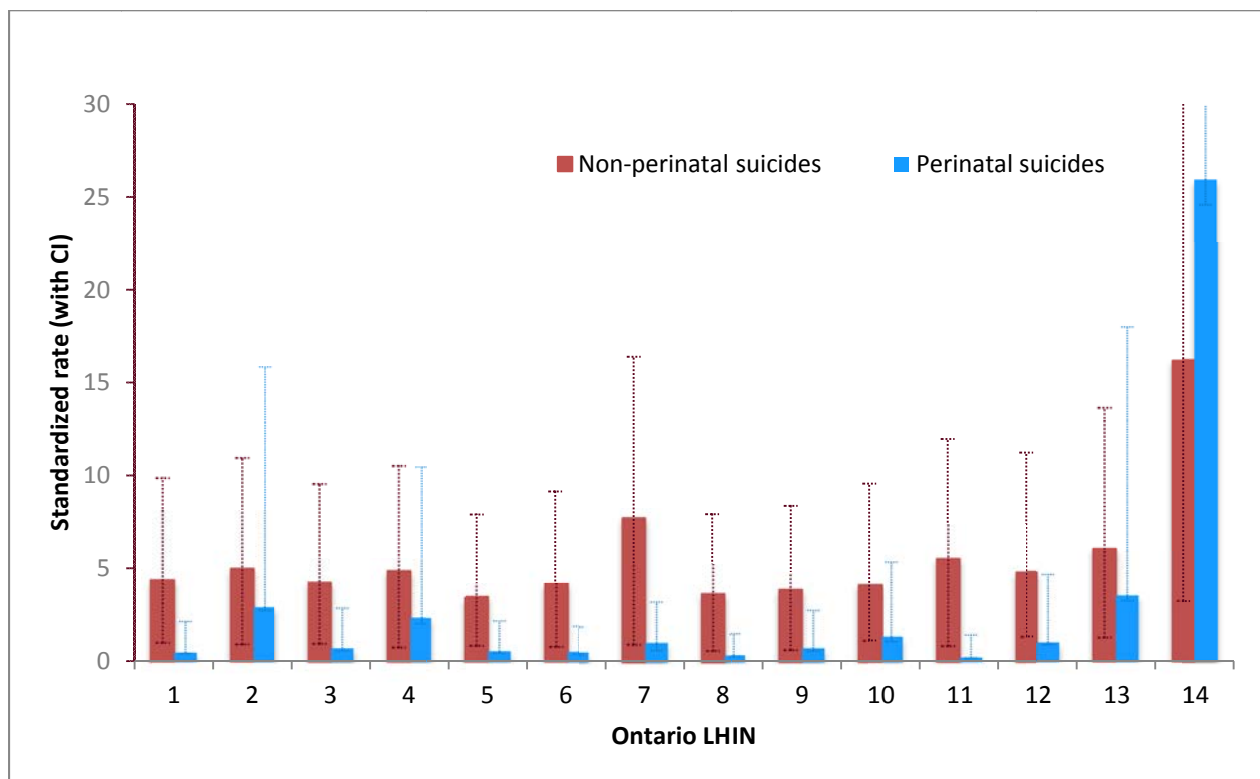

\*Denominator for calculation of non-perinatal suicide rate is all women person-years in each LHIN. Denominator for perinatal suicide rate is deliveries in each LHIN (multiplied by 1.75 to get person-years at risk). Age-standardized to 1991 Canadian female population, aged 18–45.

Ontario's Local Health Integration Networks (LHINs)

1. Erie St. Clair
2. South West
3. Waterloo Wellington
4. Hamilton Niagara Haldimand Brant
5. Central West
6. Mississauga Halton
7. Toronto Central
8. Central
9. Central East
10. South East
11. Champlain
12. North Simcoe Muskoka
13. North East
14. North West

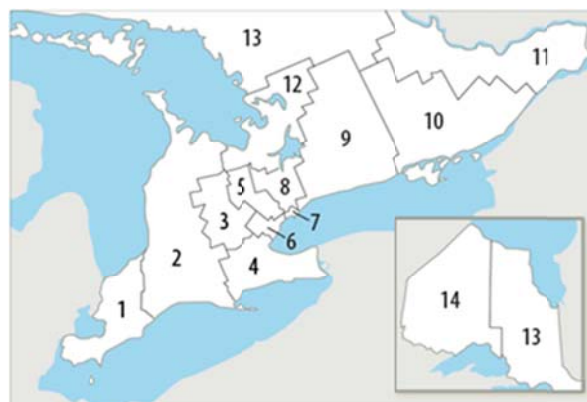

Map © Queen's Printer for Ontario 2014 (<http://www.lhins.on.ca/>; accessed 2017 Aug. 9).
